# Supplementary material for: Resveratrol Confers Protection against Rotenone-Induced Neurotoxicity by Modulating Myeloperoxidase Levels in Glial Cells
Source: PubMed Central journal article supplement (PMC3620483; doi:10.1371/journal.pone.0060654), 2013-04-08

# Supporting Information (Figure S1)

**A**

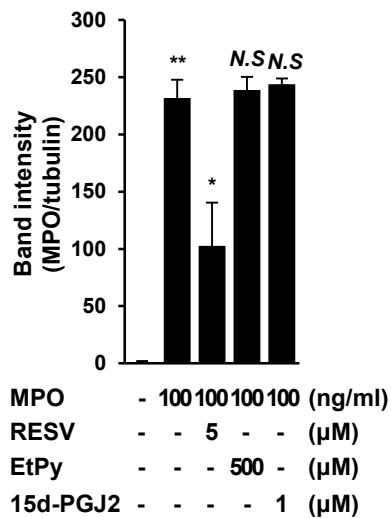

**B**

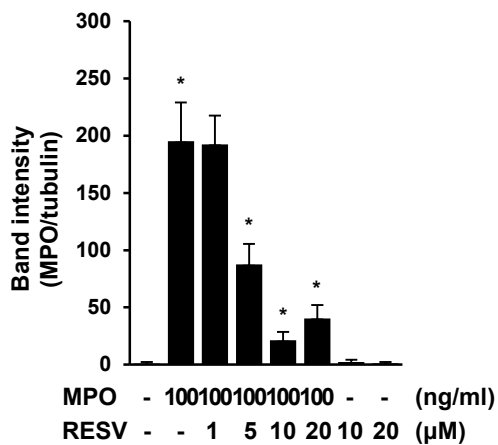

**C**

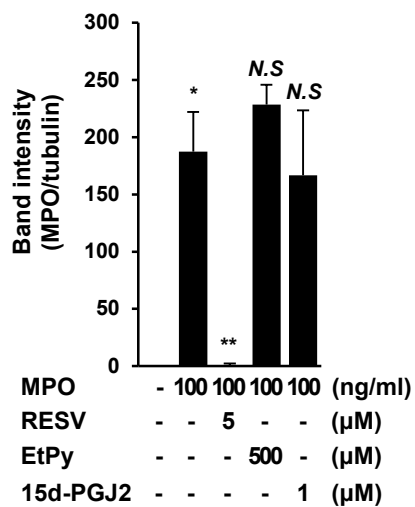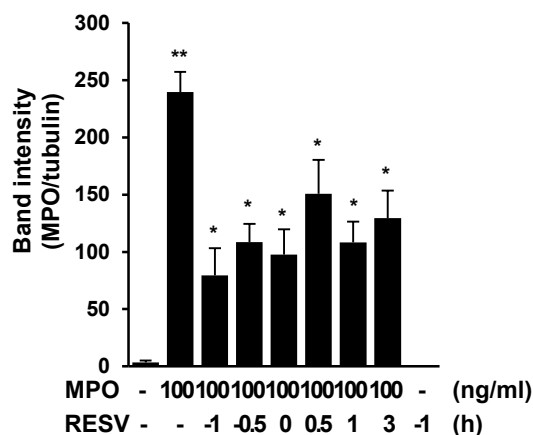

Supplement: pone.0060654.s001.pdf [file pone.0060654.s001.pdf]
