# Supplementary material for: Resveratrol Confers Protection against Rotenone-Induced Neurotoxicity by Modulating Myeloperoxidase Levels in Glial Cells
Source: PubMed Central journal article supplement (PMC3620483; doi:10.1371/journal.pone.0060654), 2013-04-08
Supplement: pone.0060654.s002.pdf [file pone.0060654.s002.pdf]

## Supporting Information (Table S1)

| Figures                                        |                                                   | Comparing Groups                                             | df                   | F value | P value | Symbol |
|------------------------------------------------|---------------------------------------------------|--------------------------------------------------------------|----------------------|---------|---------|--------|
| Figure 1                                       | A                                                 | Control vs. Rotenone                                         | 1                    | 47.755  | 0.003   | **     |
|                                                |                                                   | Rotenone vs. Rotenone + Resveratrol                          | 1                    | 20.965  | 0.01    | *      |
|                                                | B                                                 | Control vs. Rotenone                                         | 1                    | 10.446  | 0.032   | *      |
|                                                |                                                   | Rotenone vs. Rotenone + Resveratrol                          | 1                    | 23.135  | 0.009   | **     |
|                                                | C                                                 | Control vs. Rotenone                                         | 1                    | 11.138  | 0.01    | *      |
|                                                |                                                   | Rotenone vs. Rotenone + Resveratrol 5 $\mu$ M                | 1                    | 32.999  | 0.001   | **     |
| Rotenone vs. Rotenone + Resveratrol 10 $\mu$ M |                                                   | 1                                                            | 146.596              | 0.001   | **      |        |
| Figure 2                                       | A                                                 | Control vs. Myeloperoxidase                                  | 1                    | 6.056   | 0.027   | *      |
|                                                |                                                   | Myeloperoxidase vs. Myeloperoxidase + Resveratrol            | 1                    | 4.9     | 0.049   | *      |
|                                                | C                                                 | Control vs. Myeloperoxidase                                  | 1                    | 75.811  | < 0.001 | ***    |
|                                                |                                                   | Myeloperoxidase vs. Myeloperoxidase + Resveratrol 5 $\mu$ M  | 1                    | 5.745   | 0.038   | *      |
|                                                |                                                   | Myeloperoxidase vs. Myeloperoxidase + Resveratrol 10 $\mu$ M | 1                    | 10.353  | 0.009   | **     |
|                                                |                                                   | Myeloperoxidase vs. Myeloperoxidase + Resveratrol 20 $\mu$ M | 1                    | 55.129  | < 0.001 | ***    |
|                                                | D (left)                                          | Control vs. Myeloperoxidase                                  | 1                    | 20.285  | 0.002   | **     |
|                                                |                                                   | Myeloperoxidase vs. Myeloperoxidase + Resveratrol 5 $\mu$ M  | 1                    | 6.243   | 0.041   | *      |
|                                                |                                                   | Myeloperoxidase vs. Myeloperoxidase + Resveratrol 10 $\mu$ M | 1                    | 16.988  | 0.002   | **     |
|                                                | D (right)                                         | Myeloperoxidase vs. Myeloperoxidase + Resveratrol 20 $\mu$ M | 1                    | 13.038  | 0.007   | **     |
| Myeloperoxidase vs. Myeloperoxidase + ABAH     |                                                   | 1                                                            | 15.848               | 0.002   | **      |        |
| D (right)                                      | Myeloperoxidase vs. Myeloperoxidase + SHA         | 1                                                            | 15.74                | 0.002   | **      |        |
|                                                | Figure 4                                          | A (a)                                                        | Control vs. Rotenone | 1       | 29.135  | 0.006  |
| Rotenone vs. Rotenone + Resveratrol            |                                                   |                                                              | 1                    | 19.58   | 0.012   | *      |
| A (b)                                          |                                                   | Control vs. Myeloperoxidase                                  | 1                    | 57.076  | 0.002   | **     |
|                                                |                                                   | Myeloperoxidase vs. Myeloperoxidase + Resveratrol            | 1                    | 83.751  | < 0.001 | ***    |
| B                                              |                                                   | Control vs. Rotenone                                         | 1                    | 75.763  | < 0.001 | ***    |
|                                                |                                                   | Rotenone vs. Rotenone + Resveratrol                          | 1                    | 83.751  | < 0.001 | ***    |
| C                                              | Control vs. Myeloperoxidase                       | 1                                                            | 10.648               | 0.01    | *       |        |
|                                                | Myeloperoxidase vs. Myeloperoxidase + Resveratrol | 1                                                            | 13.395               | 0.007   | **      |        |
| Figure 5                                       | A (upper left)                                    | Control vs. Rotenone                                         | 1                    | 80.454  | 0.001   | **     |
|                                                |                                                   | Rotenone vs. Rotenone + Resveratrol                          | 1                    | 48.623  | 0.002   | **     |
|                                                | A (upper right)                                   | Control vs. Rotenone                                         | 1                    | 6.004   | 0.044   | *      |
|                                                |                                                   | Rotenone vs. Rotenone + Resveratrol                          | 1                    | 12.977  | 0.011   | *      |
|                                                | A (lower left)                                    | Control vs. Myeloperoxidase                                  | 1                    | 9.09    | 0.017   | *      |
|                                                |                                                   | Myeloperoxidase vs. Myeloperoxidase + Resveratrol            | 1                    | 9.369   | 0.014   | *      |
|                                                | A (lower right)                                   | Control vs. Myeloperoxidase                                  | 1                    | 29.57   | 0.006   | **     |
|                                                |                                                   | Myeloperoxidase vs. Myeloperoxidase + Resveratrol            | 1                    | 12.252  | 0.025   | *      |
|                                                | B                                                 | Control vs. Rotenone                                         | 1                    | 6.814   | 0.035   | *      |
|                                                |                                                   | Rotenone vs. Rotenone + Resveratrol                          | 1                    | 31.457  | 0.002   | **     |
|                                                | C                                                 | Control vs. Rotenone                                         | 1                    | 26.592  | < 0.001 | ***    |
|                                                |                                                   | Rotenone vs. Rotenone + Resveratrol                          | 1                    | 17.479  | 0.006   | **     |
| Figure 6                                       | A                                                 | Control vs. Rotenone                                         | 1                    | 9.356   | 0.022   | *      |
|                                                |                                                   | Rotenone vs. Rotenone + Resveratrol                          | 1                    | 19.272  | 0.0019  | **     |
|                                                |                                                   | Rotenone vs. Resveratrol                                     | 1                    | 24.272  | 0.002   | **     |
|                                                | C                                                 | Control vs. Rotenone                                         | 1                    | 10.607  | 0.014   | *      |
|                                                |                                                   | Rotenone vs. Rotenone + Resveratrol                          | 1                    | 13.084  | 0.011   | *      |
|                                                | D                                                 | Control vs. Rotenone                                         | 1                    | 29.425  | 0.002   | **     |
|                                                |                                                   | Rotenone vs. Rotenone + Resveratrol                          | 1                    | 7.576   | 0.033   | *      |
| Figure 7                                       | A                                                 | Control vs. Rotenone + Resveratrol                           | 1                    | 100.157 | < 0.001 | ***    |
|                                                |                                                   | Rotenone vs. Rotenone + Resveratrol                          | 1                    | 0.042   | 0.846   | N.S.   |
|                                                | B (left)                                          | Rotenone vs. Rotenone + Resveratrol                          | 1                    | 26.181  | 0.002   | **     |
|                                                |                                                   | Rotenone vs. Rotenone + Resveratrol                          | 1                    | 26.181  | 0.002   | **     |
|                                                | D                                                 | Rotenone vs. Rotenone + Resveratrol w/PM                     | 1                    | 3.136   | 0.115   | N.S.   |
|                                                |                                                   | Rotenone vs. Rotenone + Resveratrol w/PM                     | 1                    | 33.053  | 0.005   | **     |
| E                                              | Rotenone vs. Rotenone + Resveratrol wo/PM         | 1                                                            | 8.807                | 0.031   | *       |        |
|                                                | Rotenone vs. Rotenone + Resveratrol w/PM          | 1                                                            | 57.317               | 0.002   | **      |        |
| Figure 8                                       | A                                                 | Control vs. MPP <sup>+</sup>                                 | 1                    | 97.974  | 0.002   | **     |
|                                                |                                                   | MPP <sup>+</sup> vs. MPP <sup>+</sup> + Resveratrol          | 1                    | 13.886  | 0.014   | *      |
|                                                | B                                                 | Control vs. MPP <sup>+</sup>                                 | 1                    | 28.43   | 0.006   | **     |
|                                                |                                                   | MPP <sup>+</sup> vs. MPP <sup>+</sup> + Resveratrol          | 1                    | 14.958  | 0.018   | *      |

A One-Way Analysis of Variance (ANOVA) was used to compare means of two groups. P value in figures are marked with an asterisk. \*  $P < 0.05$ , \*\*  $P < 0.01$ , \*\*\*  $P < 0.001$ , N.S., no significant difference.
